# Supplementary material for: A secretomic view of woody and nonwoody lignocellulose degradation by Pleurotus ostreatus
Source: PubMed Central journal article supplement (PMC4772462; doi:10.1186/s13068-016-0462-9), 2016-02-29
Supplement: 13068_2016_462_MOESM2_ESM.pdf [file 13068_2016_462_MOESM2_ESM.pdf]

**ADDITIONAL FILE 2: Supplemental Tables S1-S3****Table S1. List of 241 proteins identified in the secretome of *P. ostreatus* growing on poplar wood<sup>1</sup>**

| <b>JGI-ID#</b> | <b>Type<sup>2</sup></b> | <b>Predicted protein function</b>            | <b>PSM</b> |
|----------------|-------------------------|----------------------------------------------|------------|
| 81117          | Oxid                    | LACC10                                       | 557        |
| 134564         | Oxid                    | Galactose oxidase                            | 232        |
| 60171          | Prot                    | Peptidase S8                                 | 210        |
| 116143         | Oxid                    | LACC2                                        | 160        |
| 132167         | Unkn                    | Unknown                                      | 107        |
| 88522          | Othe                    | Phosphatidylserine decarboxylase             | 95         |
| 81107          | Oxid                    | LACC9                                        | 94         |
| 62728          | Este                    | Lipase                                       | 85         |
| 99622          | Unkn                    | Unknown                                      | 81         |
| 88568          | CAZy                    | GH47                                         | 65         |
| 101121         | Othe                    | $\beta$ -1,6-N-Acetylglucosaminyltransferase | 65         |
| 75940          | Othe                    | $\alpha/\beta$ -Hydrolase                    | 57         |
| 98428          | Unkn                    | Unknown                                      | 47         |
| 124117         | CAZy                    | GH15                                         | 47         |
| 137757         | Oxid                    | VP1                                          | 47         |
| 137740         | Oxid                    | MnP3                                         | 45         |
| 50262          | Prot                    | Aspartyl protease                            | 43         |
| 90832          | CAZy                    | GH1                                          | 43         |
| 110973         | Unkn                    | Unknown                                      | 42         |
| 62096          | Othe                    | Amidohydrolase 2                             | 39         |
| 115581         | CAZy                    | GH72-CBM43                                   | 39         |
| 87572          | Oxid                    | Cupredoxin                                   | 38         |
| 45030          | Oxid                    | GMC                                          | 37         |
| 96445          | CAZy                    | CE16                                         | 37         |
| 62166          | Oxid                    | Galactose oxidase, central domain            | 36         |
| 84329          | Prot                    | Subtilase                                    | 33         |
| 91073          | Prot                    | Metalloproteases (“zincins”)                 | 30         |
| 71759          | Prot                    | S8 and S53 peptidase                         | 29         |
| 117424         | Unkn                    | Unknown                                      | 26         |
| 74226          | Unkn                    | Unknown                                      | 25         |
| 83972          | Prot                    | Peptidase S10                                | 25         |
| 53101          | CAZy                    | PL8                                          | 24         |
| 98389          | Othe                    | $\beta$ -1,6-N-Acetylglucosaminyltransferase | 24         |
| 99623          | Othe                    | Membrane attack complex                      | 24         |
| 115209         | CAZy                    | GH76                                         | 24         |
| 81104          | Oxid                    | LACC6                                        | 22         |
| 82641          | Prot                    | Serine-type peptidase                        | 22         |
| 93955          | Oxid                    | AAO                                          | 22         |
| 117427         | Unkn                    | Unknown                                      | 22         |
| 61232          | CAZy                    | GH3                                          | 21         |
| 82200          | Unkn                    | Unknown                                      | 20         |
| 83417          | Unkn                    | Unknown                                      | 20         |
| 117582         | Oxid                    | Aldo/keto reductase                          | 20         |

|        |      |                                                     |    |
|--------|------|-----------------------------------------------------|----|
| 51352  | Unkn | Unknown                                             | 19 |
| 72871  | Unkn | Unknown                                             | 19 |
| 89221  | Unkn | Unknown                                             | 19 |
| 117616 | Oxid | GMC                                                 | 19 |
| 117693 | Oxid | Aldo/keto reductase                                 | 19 |
| 61416  | CAZy | GH47                                                | 18 |
| 47522  | CAZy | GH105                                               | 17 |
| 85683  | CAZy | PL8                                                 | 17 |
| 91487  | CAZy | GH31                                                | 16 |
| 116255 | CAZy | CBM13                                               | 16 |
| 116865 | Unkn | Unknown                                             | 16 |
| 117123 | Oxid | Flavodoxin/nitric oxide synthase                    | 16 |
| 44086  | CAZy | Barwin-like endoglucanases                          | 15 |
| 55914  | Othe | Amidase                                             | 15 |
| 82770  | Othe | Phosphoglycerate mutase-like                        | 15 |
| 115140 | Prot | Aspartic-type endopeptidase                         | 15 |
| 51713  | Oxid | MnP6                                                | 14 |
| 115204 | Oxid | Lipoxygenase                                        | 14 |
| 115427 | Unkn | Unknown                                             | 14 |
| 123383 | Oxid | VP3                                                 | 14 |
| 59433  | Oxid | GMC                                                 | 13 |
| 62844  | Prot | Peptidase S9                                        | 13 |
| 81199  | Oxid | Glucose/ribitol dehydrogenase                       | 13 |
| 85298  | Prot | Cysteine-type endopeptidase                         | 13 |
| 51118  | Unkn | Unknown                                             | 12 |
| 89111  | Prot | Peptidase S9                                        | 12 |
| 93022  | Prot | Aspartic-type endopeptidase                         | 12 |
| 45206  | CAZy | GH6-CBM1                                            | 11 |
| 52629  | Prot | Peptidase A1                                        | 11 |
| 56239  | Este | Carboxylesterase                                    | 11 |
| 57949  | Prot | Peptidase S28                                       | 11 |
| 96527  | Prot | Serine carboxypeptidase                             | 11 |
| 108781 | Unkn | Unknown                                             | 11 |
| 114483 | Othe | Fungal hydrophobin                                  | 11 |
| 114771 | CAZy | GH7-CBM1                                            | 11 |
| 58999  | Este | Survival protein SurE-like phosphatase/nucleotidase | 10 |
| 62259  | Unkn | Unknown                                             | 10 |
| 78300  | Este | Ribonuclease T2                                     | 10 |
| 87860  | Unkn | Unknown                                             | 10 |
| 61644  | Othe | Lectin                                              | 9  |
| 69649  | Oxid | GMC                                                 | 9  |
| 70033  | Prot | Aspartic-type endopeptidase                         | 9  |
| 75056  | Oxid | Thioredoxine                                        | 9  |
| 98024  | CAZy | GH3                                                 | 9  |
| 106062 | Unkn | Unknown                                             | 9  |
| 109482 | Othe | Thaumatococcus                                      | 9  |
| 114098 | CAZy | GH55                                                | 9  |
| 114510 | Oxid | GMC                                                 | 9  |

|        |      |                                                     |   |
|--------|------|-----------------------------------------------------|---|
| 115859 | Unkn | Unknown                                             | 9 |
| 116309 | Oxid | FAD binding oxidoreductase                          | 9 |
| 130416 | Unkn | Unknown                                             | 9 |
| 69654  | Este | Endonuclease/exonuclease/phosphatase                | 8 |
| 84016  | Este | Carboxylesterase                                    | 8 |
| 87982  | Oxid | Glyceraldehyde-3-phosphate dehydrogenase            | 8 |
| 100586 | Oxid | FAD linked oxidase                                  | 8 |
| 115319 | Oxid | Flavodoxin/nitric oxide synthase                    | 8 |
| 115623 | CAZy | CE4                                                 | 8 |
| 127085 | Prot | Serine-type carboxypeptidase                        | 8 |
| 47034  | Prot | S8 and S53 peptidase                                | 7 |
| 84903  | Unkn | Unknown                                             | 7 |
| 84985  | CAZy | GH92                                                | 7 |
| 88317  | Prot | Serine-type carboxypeptidase                        | 7 |
| 99171  | CAZy | GH18                                                | 7 |
| 103254 | Unkn | Unknown                                             | 7 |
| 109334 | Othe | Transaldolase                                       | 7 |
| 114288 | Este | Esterase/lipase                                     | 7 |
| 116582 | Este | Survival protein SurE-like phosphatase/nucleotidase | 7 |
| 117204 | Oxid | DyP4                                                | 7 |
| 46733  | Unkn | Unknown                                             | 6 |
| 52745  | Prot | Metalloprotease                                     | 6 |
| 58838  | Unkn | Unknown                                             | 6 |
| 67327  | Unkn | Unknown                                             | 6 |
| 80285  | Othe | Hydrophobic surface binding protein                 | 6 |
| 94793  | CAZy | GH51                                                | 6 |
| 100792 | Unkn | Unknown                                             | 6 |
| 100990 | Prot | Peptidase M                                         | 6 |
| 106719 | Othe | Protein kinase                                      | 6 |
| 115424 | Prot | PeptidaseM                                          | 6 |
| 116283 | Unkn | Unknown                                             | 6 |
| 116829 | Othe | Phosphoglucomutase                                  | 6 |
| 116926 | CAZy | CE8                                                 | 6 |
| 117865 | Unkn | Unknown                                             | 6 |
| 50496  | Este | Histidine acid phosphatase                          | 5 |
| 65411  | CAZy | GH130CBM20                                          | 5 |
| 69722  | Unkn | Unknown                                             | 5 |
| 77872  | Unkn | Unknown                                             | 5 |
| 82845  | Este | Carboxylesterase                                    | 5 |
| 85083  | Este | Metallophosphoesterase                              | 5 |
| 86964  | Oxid | FAD binding domain                                  | 5 |
| 87354  | CAZy | GH35                                                | 5 |
| 89439  | Prot | Peptidase                                           | 5 |
| 90219  | CAZy | GH27                                                | 5 |
| 96680  | CAZy | GH24                                                | 5 |
| 97269  | Este | Carboxylesterase                                    | 5 |
| 110190 | Este | Ribonuclease T2                                     | 5 |
| 115916 | CAZy | GH5                                                 | 5 |

|        |      |                                                       |   |
|--------|------|-------------------------------------------------------|---|
| 116228 | CAZy | GH5-CBM1                                              | 5 |
| 117154 | Oxid | Coproporphyrinogen oxidase                            | 5 |
| 117545 | CAZy | GH25                                                  | 5 |
| 127507 | Oxid | GMC                                                   | 5 |
| 55739  | Othe | Oxalate decarboxylase                                 | 4 |
| 64440  | Unkn | Unknown                                               | 4 |
| 71475  | Este | Lipase                                                | 4 |
| 73763  | Othe | Calmodulin                                            | 4 |
| 83320  | CAZy | GH7                                                   | 4 |
| 85079  | CAZy | GH5                                                   | 4 |
| 87509  | CAZy | GH20                                                  | 4 |
| 88922  | Unkn | Unknown                                               | 4 |
| 91272  | Unkn | Unknown                                               | 4 |
| 98296  | Unkn | Unknown                                               | 4 |
| 114158 | Unkn | Unknown                                               | 4 |
| 115088 | Unkn | Unknown                                               | 4 |
| 115736 | Unkn | Unknown                                               | 4 |
| 116181 | CAZy | GH79                                                  | 4 |
| 125205 | Oxid | Methylmalonate-semialdehyde dehydrogenase (acylating) | 4 |
| 126905 | CAZy | GH78                                                  | 4 |
| 133709 | Unkn | Unknown                                               | 4 |
| 137766 | Oxid | VP2                                                   | 4 |
| 18313  | CAZy | GH18                                                  | 3 |
| 20207  | Othe | $\alpha/\beta$ -Hydrolase                             | 3 |
| 55443  | Este | Esterase/lipase                                       | 3 |
| 59305  | Othe | Guanyl-nucleotide exchange factor                     | 3 |
| 61498  | CAZy | GH16                                                  | 3 |
| 70792  | Unkn | Unknown                                               | 3 |
| 75413  | Oxid | Aldo/keto reductase                                   | 3 |
| 82557  | CAZy | GH31                                                  | 3 |
| 82918  | CAZy | GH31                                                  | 3 |
| 84333  | CAZy | GH92                                                  | 3 |
| 86351  | Oxid | Multicopper oxidase                                   | 3 |
| 87230  | Este | Endonuclease/exonuclease/phosphatase                  | 3 |
| 90132  | Oxid | NAD(P)-binding                                        | 3 |
| 90895  | Othe | Fumarylacetoacetate hydrolase                         | 3 |
| 91105  | Unkn | Unknown                                               | 3 |
| 96691  | CAZy | GH10                                                  | 3 |
| 97290  | Este | Lipase                                                | 3 |
| 101650 | Unkn | Unknown                                               | 3 |
| 102212 | CAZy | Barwin-like endoglucanases                            | 3 |
| 107973 | Oxid | FAD binding oxidoreductase                            | 3 |
| 114053 | CAZy | Barwin-like endoglucanases                            | 3 |
| 114786 | Othe | Methionine synthase II                                | 3 |
| 116022 | Othe | Enolase                                               | 3 |
| 116292 | CAZy | GH79                                                  | 3 |
| 116338 | CAZy | GH37                                                  | 3 |
| 117340 | Oxid | Aldo/keto reductase                                   | 3 |

|        |      |                                               |   |
|--------|------|-----------------------------------------------|---|
| 117351 | CAZy | CE1-CBM1                                      | 3 |
| 121421 | Este | Metallo dependent phosphatase                 | 3 |
| 128131 | CAZy | GH105                                         | 3 |
| 130214 | CAZy | GH3                                           | 3 |
| 134433 | CAZy | GH35                                          | 3 |
| 33068  | Este | Endoribonuclease L-PSP                        | 2 |
| 54694  | Oxid | Dioxygenase                                   | 2 |
| 55745  | Unkn | Unknown                                       | 2 |
| 57185  | Este | Endonuclease/exonuclease/phosphatase          | 2 |
| 58910  | Oxid | Aldo/keto reductase                           | 2 |
| 62364  | Unkn | Unknown                                       | 2 |
| 63765  | CAZy | GH16                                          | 2 |
| 63775  | Oxid | FAD binding catalytic                         | 2 |
| 64335  | Este | Lipase 3                                      | 2 |
| 69174  | Unkn | Unknown                                       | 2 |
| 74063  | Oxid | Uricase (urate oxidase)                       | 2 |
| 75659  | CAZy | GH5                                           | 2 |
| 77373  | Oxid | Glyoxal oxidase                               | 2 |
| 78619  | CAZy | CE 12                                         | 2 |
| 82569  | Unkn | Unknown                                       | 2 |
| 82943  | Oxid | Amine oxidase                                 | 2 |
| 83261  | Oxid | 3-Isopropylmalate dehydrogenase               | 2 |
| 84216  | Othe | Glyoxalase                                    | 2 |
| 84996  | CAZy | GH12                                          | 2 |
| 85420  | CAZy | GH18                                          | 2 |
| 88981  | CAZy | GH31                                          | 2 |
| 91667  | Oxid | Pyridine nucleotide-disulphide oxidoreductase | 2 |
| 100288 | Unkn | Unknown                                       | 2 |
| 107625 | Prot | Zn-Dependent exopeptidases                    | 2 |
| 112716 | Este | Endoribonuclease L-PSP                        | 2 |
| 114340 | Othe | Chaperones HSP70/HSC70, HSP70 superfamily     | 2 |
| 115392 | Unkn | Unknown                                       | 2 |
| 115613 | Oxid | Superoxide dismutase (manganese)              | 2 |
| 115628 | CAZy | CE4                                           | 2 |
| 115734 | Unkn | Unknown                                       | 2 |
| 115754 | Othe | Translation elongation factor EF-1 alpha/Tu   | 2 |
| 117082 | Unkn | Unknown                                       | 2 |
| 117534 | CAZy | GH27                                          | 2 |
| 117691 | Unkn | Unknown                                       | 2 |
| 121882 | Oxid | GMC                                           | 2 |
| 123302 | Othe | $\alpha/\beta$ -Hydrolase                     | 2 |
| 123331 | Este | PL1                                           | 2 |
| 123396 | Unkn | Unknown                                       | 2 |
| 125911 | CAZy | GH10                                          | 2 |
| 126566 | Este | Carotenoid ester lipase precursor             | 2 |
| 127463 | CAZy | GH115                                         | 2 |
| 129600 | Oxid | GMC                                           | 2 |
| 132186 | CAZy | Barwin-like endoglucanases                    | 2 |

|        |      |                             |      |
|--------|------|-----------------------------|------|
| 62766  | CAZy | GH32                        | 1    |
| 67725  | Prot | Metalloprotease (“zincins”) | 1    |
| 70187  | Prot | Zn-dependent exopeptidase   | 1    |
| 99730  | Este | PLC-like phosphodiesterases | 1    |
| 116971 | Oxid | FAD binding domain          | 1    |
| Total  |      |                             | 4021 |

<sup>1</sup>Semi-quantitative analysis based on PSM (peptide-spectrum match) values; <sup>2</sup>Protein types= CAZy, carbohydrate-active proteins; Este, esterases; Othe, proteins with other functions; Oxid, oxidoreductases; Phos, phosphatases; Prot, proteases; Unkn, unknown-function proteins

**Table S2. List of 391 proteins identified in the secretome of *P. ostreatus* growing on wheat straw<sup>1</sup>**

| JGI-ID# | Type <sup>2</sup> | Predicted protein function               | PSM |
|---------|-------------------|------------------------------------------|-----|
| 81117   | Oxid              | LACC10                                   | 459 |
| 60171   | Prot              | Peptidase S8                             | 250 |
| 134564  | Oxid              | Galactose oxidase                        | 105 |
| 71759   | Prot              | S8 and S53 peptidase                     | 92  |
| 75940   | Othe              | $\alpha/\beta$ -Hydrolase                | 90  |
| 81107   | Oxid              | LACC9                                    | 84  |
| 116143  | Oxid              | LACC2                                    | 77  |
| 110973  | Unkn              | Unknown                                  | 71  |
| 98024   | CAZy              | GH3                                      | 66  |
| 99622   | Unkn              | Unknown                                  | 66  |
| 84329   | Pep               | Subtilase                                | 60  |
| 137740  | Oxid              | MnP3                                     | 49  |
| 81104   | Oxid              | LACC6                                    | 47  |
| 88568   | CAZy              | GH47                                     | 46  |
| 117693  | Oxid              | Aldo/keto reductase                      | 44  |
| 94793   | CAZy              | GH51                                     | 43  |
| 124117  | CAZy              | GH15                                     | 42  |
| 114483  | Othe              | Fungal hydrophobin                       | 41  |
| 115427  | Unkn              | Unknown                                  | 40  |
| 83972   | Prot              | peptidase S10                            | 39  |
| 115424  | Prot              | PeptidaseM                               | 39  |
| 116865  | Unkn              | Unknown                                  | 38  |
| 114786  | Othe              | Methionine synthase II                   | 37  |
| 61232   | CAZy              | GH3                                      | 36  |
| 132167  | Unkn              | Unknown                                  | 36  |
| 116022  | Othe              | Enolase                                  | 35  |
| 137757  | Oxid              | VP1                                      | 35  |
| 88371   | Prot              | Peptidase                                | 34  |
| 96445   | CAZy              | CE16                                     | 33  |
| 98428   | Unkn              | Unknown                                  | 30  |
| 87982   | Oxid              | Glyceraldehyde-3-phosphate dehydrogenase | 29  |
| 91073   | Prot              | Metalloproteases (“zincins”)             | 29  |
| 89439   | Prot              | Peptidase                                | 28  |
| 117424  | Unkn              | Unknown                                  | 27  |
| 99623   | Othe              | Membrane attack complex component        | 26  |
| 106719  | Othe              | Protein kinase                           | 26  |
| 115209  | CAZy              | GH76                                     | 26  |
| 69649   | Oxid              | GMC                                      | 25  |
| 75413   | Oxid              | Aldo/keto reductase                      | 25  |
| 81199   | Oxid              | Glucose/ribitol dehydrogenase            | 25  |
| 47522   | CAZy              | GH105                                    | 23  |
| 62728   | Este              | Lipase                                   | 23  |
| 70033   | Prot              | Aspartic-type endopeptidase              | 23  |
| 137766  | Oxid              | VP2                                      | 23  |
| 45030   | Oxid              | GMC                                      | 22  |

|        |      |                                             |    |
|--------|------|---------------------------------------------|----|
| 109334 | Othe | Transaldolase                               | 22 |
| 117123 | Oxid | Flavodoxin/nitric oxide synthase            | 22 |
| 134433 | CAZy | GH35                                        | 22 |
| 117204 | Oxid | DyP4                                        | 21 |
| 52745  | Prot | Metalloprotease                             | 19 |
| 93955  | Oxid | AAO                                         | 19 |
| 115754 | Othe | Translation elongation factor EF-1 alpha/Tu | 19 |
| 117427 | Unkn | Unknown                                     | 19 |
| 57580  | Othe | Structural constituent of ribosome          | 18 |
| 82200  | Unkn | Unknown                                     | 18 |
| 82641  | Prot | Serine-type peptidase                       | 18 |
| 87860  | Unkn | Unknown                                     | 18 |
| 53101  | CAZy | PL8                                         | 16 |
| 66181  | Othe | Ubiquitin                                   | 16 |
| 82608  | Othe | Amidase                                     | 16 |
| 86964  | Oxid | FAD binding domain                          | 16 |
| 90832  | CAZy | GH1                                         | 16 |
| 117150 | CAZy | S-adenosylhomocysteine hydrolase            | 16 |
| 127507 | Oxid | GMC                                         | 16 |
| 74724  | Othe | Structural constituent of ribosome          | 15 |
| 84985  | CAZy | GH92                                        | 15 |
| 96680  | CAZy | GH24                                        | 15 |
| 100288 | Unkn | Unknown                                     | 15 |
| 115613 | Oxid | Superoxide dismutase (manganese)            | 15 |
| 116375 | Othe | Pyruvate decarboxylase                      | 15 |
| 117582 | Oxid | Aldo/keto reductase                         | 15 |
| 126905 | CAZy | GH78                                        | 15 |
| 50262  | Prot | Aspartyl protease                           | 14 |
| 51105  | Prot | Subtilase                                   | 14 |
| 51713  | Oxid | MnP6                                        | 14 |
| 55914  | Othe | Amidase                                     | 14 |
| 57387  | CAZy | $\beta$ -N-Acetylhexosaminidase-like domain | 14 |
| 82945  | Othe | Concanavalin A-like lectins/glucanases      | 14 |
| 85083  | Este | Metallophosphoesterase                      | 14 |
| 87354  | CAZy | GH35                                        | 14 |
| 88522  | Othe | Phosphatidylserine decarboxylase            | 14 |
| 90132  | Oxid | NAD(P)-binding                              | 14 |
| 115916 | CAZy | GH5                                         | 14 |
| 116829 | Othe | Phosphoglucomutase                          | 14 |
| 51118  | Unkn | Unknown                                     | 13 |
| 56239  | Este | Carboxylesterase                            | 13 |
| 75730  | Othe | PLP-dependent transferase                   | 13 |
| 109482 | Othe | Thaumatococcus                              | 13 |
| 115319 | Oxid | Flavodoxin/nitric oxide synthase            | 13 |
| 117616 | Oxid | GMC                                         | 13 |
| 57949  | Prot | Peptidase S28                               | 12 |
| 70187  | Prot | Zn-dependent exopeptidase                   | 12 |
| 74226  | Unkn | Unknown                                     | 12 |



|        |      |                                                       |    |
|--------|------|-------------------------------------------------------|----|
| 91487  | CAZy | GH31                                                  | 12 |
| 101650 | Unkn | Unknown                                               | 12 |
| 110190 | Este | Ribonuclease T2                                       | 12 |
| 116926 | CAZy | CE8                                                   | 12 |
| 127085 | Prot | Serine-type carboxypeptidase                          | 12 |
| 47034  | Prot | S8 and S53 peptidase                                  | 11 |
| 60199  | Unkn | Unknown                                               | 11 |
| 61416  | CAZy | GH47                                                  | 11 |
| 63225  | Oxid | NAD(P)-binding                                        | 11 |
| 75056  | Oxid | Thioredoxine                                          | 11 |
| 84333  | CAZy | GH92                                                  | 11 |
| 84963  | Othe | Structural constituent of ribosome                    | 11 |
| 114340 | Othe | Chaperones HSP70/HSC70, HSP70 superfamily             | 11 |
| 116481 | Othe | Transaldolase                                         | 11 |
| 116582 | Este | Survival protein SurE-like phosphatase/nucleotidase   | 11 |
| 117567 | Oxid | Phosphogluconate dehydrogenase (decarboxylating)      | 11 |
| 130214 | CAZy | GH3                                                   | 11 |
| 51352  | Unkn | Unknown                                               | 10 |
| 62844  | Prot | Peptidase S9                                          | 10 |
| 69654  | Este | Endonuclease/exonuclease/phosphatase                  | 10 |
| 83261  | Oxid | 3-Isopropylmalate dehydrogenase                       | 10 |
| 85063  | Prot | Peptidase S28                                         | 10 |
| 85102  | Oxid | Aldo/keto reductase                                   | 10 |
| 87509  | CAZy | GH20                                                  | 10 |
| 107625 | Prot | Zn-Dependent exopeptidases                            | 10 |
| 115073 | CAZy | GH3                                                   | 10 |
| 115581 | CAZy | GH72-CBM43                                            | 10 |
| 117154 | Oxid | Coproporphyrinogen oxidase                            | 10 |
| 133203 | Unkn | Unknown                                               | 10 |
| 55443  | Este | Esterase/lipase                                       | 9  |
| 58710  | CAZy | GH78                                                  | 9  |
| 58838  | Unkn | Unknown                                               | 9  |
| 70501  | Oxid | Malate dehydrogenase                                  | 9  |
| 74063  | Oxid | Uricase (urate oxidase)                               | 9  |
| 84903  | Unkn | Unknown                                               | 9  |
| 87572  | Oxid | Cupredoxin                                            | 9  |
| 88317  | Prot | Serine-type carboxypeptidase                          | 9  |
| 89221  | Unkn | Unknown                                               | 9  |
| 114250 | Othe | Structural constituent of ribosome                    | 9  |
| 114288 | Este | Esterase/lipase                                       | 9  |
| 115934 | Othe | Elongation factor 2                                   | 9  |
| 116181 | CAZy | GH79                                                  | 9  |
| 116206 | Othe | Structural constituent of ribosome                    | 9  |
| 116641 | Oxid | Malate dehydrogenase                                  | 9  |
| 125205 | Oxid | Methylmalonate-semialdehyde dehydrogenase (acylating) | 9  |
| 58910  | Oxid | Aldo/keto reductase                                   | 8  |
| 75359  | Othe | Nucleoside-diphosphate kinase                         | 8  |
| 78300  | Este | Ribonuclease T2                                       | 8  |

|        |       |                                                     |   |
|--------|-------|-----------------------------------------------------|---|
| 98479  | Othe  | Structural constituent of ribosome                  | 8 |
| 114214 | Prot  | Metallopeptidase                                    | 8 |
| 114369 | CAZy  | GT4                                                 | 8 |
| 115821 | Othe  | Pyruvate kinase                                     | 8 |
| 117340 | Oxid  | Aldo/keto reductase                                 | 8 |
| 128131 | CAZy  | GH105                                               | 8 |
| 28894  | CAZy  | GH16                                                | 7 |
| 46733  | Unkn  | Unknown                                             | 7 |
| 52438  | CAZy  | GH20                                                | 7 |
| 52629  | Prot  | Peptidase A1                                        | 7 |
| 64171  | Othe  | Structural constituent of ribosome                  | 7 |
| 73130  | Othe  | Translation initiation factor 3, subunit e (eIF-3e) | 7 |
| 78036  | Othe  | Structural constituent of ribosome                  | 7 |
| 83417  | Unkn  | Unknown                                             | 7 |
| 87230  | Este  | Endonuclease/exonuclease/phosphatase                | 7 |
| 93022  | Prot  | Aspartic-type endopeptidase                         | 7 |
| 96186  | Este  | Inorganic pyrophosphatase                           | 7 |
| 97269  | Este  | Carboxylesterase                                    | 7 |
| 100990 | Prot  | Peptidase M                                         | 7 |
| 114158 | Unkn  | Unknown                                             | 7 |
| 114566 | Othe  | Structural constituent of ribosome                  | 7 |
| 115261 | Othe  | 2-Methylcitrate dehydratase                         | 7 |
| 116125 | Trans | Phosphokerolase                                     | 7 |
| 116292 | CAZy  | GH79                                                | 7 |
| 116309 | Oxid  | FAD binding oxidoreductase acting on CH-OH groups   | 7 |
| 116545 | CAZy  | GH35                                                | 7 |
| 132795 | Othe  | Structural constituent of ribosome                  | 7 |
| 44292  | Unkn  | Unknown                                             | 6 |
| 49436  | Prot  | Aspartic-type endopeptidase                         | 6 |
| 49740  | Othe  | Structural constituent of ribosome                  | 6 |
| 50496  | Este  | Histidine acid phosphatase                          | 6 |
| 51750  | Othe  | Structural constituent of ribosome                  | 6 |
| 54867  | CAZy  | GH430CBM35                                          | 6 |
| 62096  | Othe  | Amidohydrolase 2                                    | 6 |
| 69607  | Othe  | Structural constituent of ribosome                  | 6 |
| 71475  | Este  | Lipase                                              | 6 |
| 71883  | Othe  | Rab GDI protein                                     | 6 |
| 82316  | Othe  | Chaperone                                           | 6 |
| 82770  | Othe  | Phosphoglycerate mutase-like                        | 6 |
| 85079  | CAZy  | GH5                                                 | 6 |
| 85685  | CAZy  | PL8                                                 | 6 |
| 88827  | Oxid  | Catalase                                            | 6 |
| 89668  | Othe  | $\alpha/\beta$ -Hydrolase                           | 6 |
| 89918  | CAZy  | Six-hairpin glycosidase-like                        | 6 |
| 98296  | Unkn  | Unknown                                             | 6 |
| 99730  | Este  | PLC-like phosphodiesterases                         | 6 |
| 103254 | Unkn  | Unknown                                             | 6 |
| 106062 | Unkn  | Unknown                                             | 6 |

|        |      |                                           |   |
|--------|------|-------------------------------------------|---|
| 114313 | Prot | Dipeptidyl-peptidase III                  | 6 |
| 114626 | Oxid | Dehydrogenase (1-pyrroline-5-carboxylate) | 6 |
| 115204 | Oxid | Lipoxygenase                              | 6 |
| 115859 | Unkn | Unknown                                   | 6 |
| 117545 | CAZy | GH25                                      | 6 |
| 117865 | Unkn | Unknown                                   | 6 |
| 121422 | Othe | Chaperonin Cpn60                          | 6 |
| 123302 | Othe | $\alpha/\beta$ -Hydrolase                 | 6 |
| 130416 | Unkn | Unknown                                   | 6 |
| 130544 | CAZy | GH3                                       | 6 |
| 45547  | CAZy | GH43                                      | 5 |
| 61644  | Othe | Lectin                                    | 5 |
| 62166  | Oxid | Galactose oxidase, central domain         | 5 |
| 64335  | Este | Lipase 3                                  | 5 |
| 82943  | Oxid | Amine oxidase                             | 5 |
| 84016  | Este | Carboxylesterase                          | 5 |
| 85084  | Este | Metallophosphoesterase                    | 5 |
| 88761  | Prot | Metalloendopeptidase                      | 5 |
| 89478  | CAZy | GH28                                      | 5 |
| 90953  | CAZy | GH28                                      | 5 |
| 91272  | Unkn | Unknown                                   | 5 |
| 93329  | Unkn | Unknown                                   | 5 |
| 93757  | Prot | Proteasome                                | 5 |
| 96691  | CAZy | GH10                                      | 5 |
| 99171  | CAZy | GH18                                      | 5 |
| 104195 | Othe | Structural constituent of ribosome        | 5 |
| 107973 | Oxid | FAD binding oxidoreductase                | 5 |
| 113469 | Oxid | Aldo/keto reductase                       | 5 |
| 114605 | Oxid | Amine oxidase                             | 5 |
| 114996 | Othe | Structural constituent of ribosome        | 5 |
| 115359 | Othe | Phosphoenolpyruvate carboxykinase         | 5 |
| 115494 | Prot | Subtilase                                 | 5 |
| 116166 | Othe | ATP-citrate lyase                         | 5 |
| 116255 | CAZy | CBM13                                     | 5 |
| 117082 | Unkn | Unknown                                   | 5 |
| 117351 | CAZy | CE1-CBM1                                  | 5 |
| 117603 | Oxid | Thioredoxin                               | 5 |
| 117719 | Othe | Glycine hydroxymethyltransferase          | 5 |
| 123396 | Unkn | Unknown                                   | 5 |
| 47519  | Unkn | Unknown                                   | 4 |
| 61877  | CAZy | GH95                                      | 4 |
| 76499  | Othe | Structural constituent of ribosome        | 4 |
| 77378  | Oxid | NAD(P)-binding                            | 4 |
| 80141  | Oxid | Aldehyde dehydrogenase                    | 4 |
| 80476  | Othe | Peptidyl-prolyl cis-trans isomerase       | 4 |
| 82845  | Este | Carboxylesterase                          | 4 |
| 85683  | CAZy | PL8                                       | 4 |
| 86091  | Oxid | FAD binding catalytic                     | 4 |

|        |      |                                                     |   |
|--------|------|-----------------------------------------------------|---|
| 88922  | Unkn | Unknown                                             | 4 |
| 90895  | Othe | Fumarylacetoacetate hydrolase                       | 4 |
| 91667  | Oxid | Pyridine nucleotide-disulphide oxidoreductase       | 4 |
| 95791  | CAZy | GH5                                                 | 4 |
| 98389  | Othe | $\beta$ -1,6-N-Acetylglucosaminyltransferase        | 4 |
| 104053 | Othe | Structural constituent of ribosome                  | 4 |
| 110670 | Othe | Argininosuccinate synthase                          | 4 |
| 111061 | Oxid | NAD(P)-binding                                      | 4 |
| 114602 | Prot | S8 and S53 peptidase                                | 4 |
| 115756 | Othe | Dienelactone hydrolase                              | 4 |
| 116719 | Othe | Structural constituent of ribosome                  | 4 |
| 116886 | Oxid | NAD(P)-binding                                      | 4 |
| 116971 | Oxid | FAD binding domain                                  | 4 |
| 117335 | Oxid | NAD(P)-binding                                      | 4 |
| 122614 | Este | Carboxylesterase                                    | 4 |
| 122680 | Othe | Structural constituent of ribosome                  | 4 |
| 126430 | Unkn | Unknown                                             | 4 |
| 133592 | Othe | Hemopexin                                           | 4 |
| 133709 | Unkn | Unknown                                             | 4 |
| 18313  | CAZy | GH18                                                | 3 |
| 44086  | CAZy | Barwin-like endoglucanases                          | 3 |
| 44321  | Unkn | Unknown                                             | 3 |
| 45197  | Othe | Structural constituent of ribosome                  | 3 |
| 48547  | Unkn | Unknown                                             | 3 |
| 52165  | Othe | Structural constituent of ribosome                  | 3 |
| 54344  | Othe | Structural constituent of ribosome                  | 3 |
| 58999  | Este | Survival protein SurE-like phosphatase/nucleotidase | 3 |
| 59305  | Othe | Guanyl-nucleotide exchange factor                   | 3 |
| 62259  | Unkn | Unknown                                             | 3 |
| 62364  | Unkn | Unknown                                             | 3 |
| 63267  | Othe | Mandelate racemase/muconate lactonizing enzyme      | 3 |
| 63765  | CAZy | GH16                                                | 3 |
| 64533  | Unkn | Unknown                                             | 3 |
| 70797  | Othe | Structural constituent of ribosome                  | 3 |
| 73723  | Othe | Profilin/allergen                                   | 3 |
| 75589  | Othe | F0F1-type ATP synthase                              | 3 |
| 76283  | Othe | Structural constituent of ribosome                  | 3 |
| 82259  | Othe | Structural constituent of ribosome                  | 3 |
| 82569  | Unkn | Unknown                                             | 3 |
| 84996  | CAZy | GH12                                                | 3 |
| 85018  | CAZy | GH28                                                | 3 |
| 85298  | Prot | Peptidase                                           | 3 |
| 85420  | CAZy | GH18                                                | 3 |
| 86351  | Oxid | Multicopper oxidase                                 | 3 |
| 86370  | CAZy | CE4                                                 | 3 |
| 88121  | Othe | Pyruvate carboxylase                                | 3 |
| 88981  | CAZy | GH31                                                | 3 |
| 90153  | Oxid | NAD(P)-binding                                      | 3 |

|        |      |                                                           |   |
|--------|------|-----------------------------------------------------------|---|
| 100586 | Oxid | FAD linked oxidase                                        | 3 |
| 101484 | Oxid | Aldo/keto reductase                                       | 3 |
| 109912 | Othe | WD40 repeat like                                          | 3 |
| 111867 | Othe | Thiolase-like                                             | 3 |
| 112716 | Este | Endoribonuclease L-PSP                                    | 3 |
| 114053 | CAZy | Barwin-like endoglucanases                                | 3 |
| 114149 | Oxid | Lysine-ketoglutarate reductase/saccharopine dehydrogenase | 3 |
| 114164 | Othe | Transketolase                                             | 3 |
| 114415 | Este | DNase I-like                                              | 3 |
| 114585 | CAZy | GH92                                                      | 3 |
| 114678 | Unkn | Unknown                                                   | 3 |
| 115140 | Prot | Aspartic-type endopeptidase                               | 3 |
| 116518 | Prot | Endopeptidase                                             | 3 |
| 116749 | Othe | Histone H4                                                | 3 |
| 116842 | Othe | Structural constituent of ribosome                        | 3 |
| 117301 | Othe | $\beta$ -1,6-N-Acetylglucosaminyltransferase              | 3 |
| 127463 | CAZy | GH115                                                     | 3 |
| 133387 | Othe | Chaperonin clpA/B                                         | 3 |
| 134731 | Oxid | FAD dependent oxidoreductase                              | 3 |
| 22129  | Unkn | Unknown                                                   | 2 |
| 33068  | Este | Endoribonuclease L-PSP                                    | 2 |
| 45206  | CAZy | GH6-CBM1                                                  | 2 |
| 48638  | Othe | $\alpha/\beta$ -Hydrolase                                 | 2 |
| 48699  | CAZy | GH79                                                      | 2 |
| 49652  | Othe | Kynurenine aminotransferase                               | 2 |
| 49690  | Othe | Purine phosphorylase, family 2                            | 2 |
| 53822  | Othe | DNA-binding HORMA                                         | 2 |
| 54160  | Unkn | Unknown                                                   | 2 |
| 54694  | Oxid | Dioxygenase                                               | 2 |
| 55745  | Unkn | Unknown                                                   | 2 |
| 56050  | Unkn | Unknown                                                   | 2 |
| 59181  | CAZy | GH18                                                      | 2 |
| 59433  | Oxid | GMC                                                       | 2 |
| 62380  | Oxid | FAD linked oxidase                                        | 2 |
| 65411  | CAZy | GH130CBM20                                                | 2 |
| 65926  | Othe | PLP-dependent transferases                                | 2 |
| 68912  | Oxid | Aldo/keto reductase                                       | 2 |
| 69174  | Unkn | Unknown                                                   | 2 |
| 70792  | Unkn | Unknown                                                   | 2 |
| 72169  | Unkn | Unknown                                                   | 2 |
| 72745  | Othe | Aegerolysin                                               | 2 |
| 74322  | Oxid | P450                                                      | 2 |
| 74368  | Unkn | Unknown                                                   | 2 |
| 74745  | CAZy | CBM13                                                     | 2 |
| 75666  | Oxid | Dehydrogenase                                             | 2 |
| 77045  | Oxid | CCP                                                       | 2 |
| 78083  | Othe | Structural constituent of ribosome                        | 2 |
| 78389  | Othe | Structural constituent of ribosome                        | 2 |

|        |      |                                                     |   |
|--------|------|-----------------------------------------------------|---|
| 79147  | Unkn | Unknown                                             | 2 |
| 81650  | CAZy | GH10                                                | 2 |
| 82096  | Oxid | Aldo/keto reductase                                 | 2 |
| 82362  | Othe | 26S Proteasome regulatory complex                   | 2 |
| 82557  | CAZy | GH31                                                | 2 |
| 82670  | Prot | Peptidase M20                                       | 2 |
| 84785  | Othe | Actin-related protein Arp2/3 complex, subunit ARPC4 | 2 |
| 85385  | Othe | Nuclear pore complex, rNpl4 component (sc Npl4)     | 2 |
| 85526  | CAZy | Cellobiohydrolase                                   | 2 |
| 85660  | Othe | Structural constituent of ribosome                  | 2 |
| 85832  | Othe | Phosphoglycerate mutase-like                        | 2 |
| 86008  | Este | Lipase                                              | 2 |
| 87925  | Oxid | GMC                                                 | 2 |
| 88016  | Othe | Translation initiation factor 3, subunit e (eIF-3e) | 2 |
| 88069  | Othe | Structural constituent of ribosome                  | 2 |
| 88781  | Prot | Peptidase                                           | 2 |
| 89635  | Unkn | Unknown                                             | 2 |
| 89703  | Oxid | FAD binding oxidoreductase                          | 2 |
| 92630  | Othe | $\alpha/\beta$ -Hydrolases                          | 2 |
| 94291  | CAZy | GH2                                                 | 2 |
| 100231 | CAZy | GH7                                                 | 2 |
| 100542 | Oxid | Alkyl hydroperoxide reductase                       | 2 |
| 100792 | Unkn | Unknown                                             | 2 |
| 105369 | CAZy | GH24                                                | 2 |
| 107254 | Unkn | Unknown                                             | 2 |
| 108781 | Unkn | Unknown                                             | 2 |
| 109884 | Othe | Structural constituent of ribosome                  | 2 |
| 111904 | Othe | Rho GDP-dissociation inhibitor                      | 2 |
| 112873 | Othe | Translation initiation factor 6                     | 2 |
| 114098 | CAZy | GH55                                                | 2 |
| 114108 | Othe | Ribulose-phosphate binding barrel                   | 2 |
| 114114 | Othe | Small GTPase mediated signal transduction           | 2 |
| 114647 | Othe | Chaperone (14-3-3 family)                           | 2 |
| 114840 | Prot | Proteasome                                          | 2 |
| 115029 | Prot | Endopeptidase                                       | 2 |
| 115088 | Unkn | Unknown                                             | 2 |
| 115315 | Othe | Structural constituent of ribosome                  | 2 |
| 115579 | Unkn | Unknown                                             | 2 |
| 115623 | CAZy | CE4                                                 | 2 |
| 115628 | CAZy | CE4                                                 | 2 |
| 115734 | Unkn | Unknown                                             | 2 |
| 115769 | Othe | Structural constituent of ribosome                  | 2 |
| 115805 | Othe | Structural constituent of ribosome                  | 2 |
| 116283 | Unkn | Unknown                                             | 2 |
| 116474 | Oxid | NAD(P)-binding                                      | 2 |
| 116962 | Oxid | Aldo/keto reductase                                 | 2 |
| 117655 | Othe | Structural constituent of ribosome                  | 2 |
| 117691 | Unkn | Unknown                                             | 2 |

|        |      |                                               |      |
|--------|------|-----------------------------------------------|------|
| 120978 | Oxid | Alcohol dehydrogenase                         | 2    |
| 121759 | Oxid | UDP-glucose/GDP-mannose dehydrogenase         | 2    |
| 121882 | Oxid | GMC                                           | 2    |
| 122086 | CAZy | GH7                                           | 2    |
| 126419 | Oxid | Homogentisate 1,2-dioxygenase                 | 2    |
| 130167 | Oxid | Pyridine nucleotide-disulphide oxidoreductase | 2    |
| 132590 | Othe | Major facilitator superfamily                 | 2    |
| 133172 | Prot | Peptidase S33                                 | 2    |
| 134190 | Oxid | NADH:flavin oxidoreductase                    | 2    |
| 113478 | Othe | Aldose 1-epimerase                            | 1    |
| Total  |      |                                               | 4728 |

<sup>1</sup>Semi-quantitative analysis based on PSM (peptide-spectrum match) values; <sup>2</sup>Protein types= CAZy, carbohydrate-active proteins; Este, esterases; Othe, proteins with other functions; Oxid, oxidoreductases; Phos, phosphatase; Prot, proteases; Unkn, unknown-function proteins

**Table S3. List of 206 proteins identified in the secretome of *P. ostreatus* growing on HAT (glucose) medium<sup>1</sup>**

| JGI-ID# | Type <sup>2</sup> | Predicted protein function                        | PSM |
|---------|-------------------|---------------------------------------------------|-----|
| 71759   | Prot              | S8 and S53 peptidase                              | 566 |
| 134564  | Oxid              | Galactose oxidase                                 | 462 |
| 132884  | Othe              | $\alpha/\beta$ -Hydrolase                         | 457 |
| 93022   | Prot              | Aspartic-type endopeptidase                       | 328 |
| 101121  | Othe              | $\beta$ -1,6-N-Acetylglucosaminyltransferase      | 288 |
| 84016   | Este              | Carboxylesterase                                  | 253 |
| 94009   | Oxid              | Galactose oxidase                                 | 241 |
| 100586  | Oxid              | FAD linked oxidase                                | 213 |
| 52745   | Prot              | Metalloprotease                                   | 210 |
| 83417   | Unkn              | Unknown                                           | 209 |
| 115072  | Othe              | $\alpha/\beta$ -Hydrolase                         | 177 |
| 124117  | CAZy              | GH15                                              | 134 |
| 98389   | Othe              | $\beta$ -1,6-N-Acetylglucosaminyltransferase      | 96  |
| 91123   | Oxid              | FAD binding oxidoreductase acting on CH-OH groups | 86  |
| 113478  | Othe              | Aldose 1-epimerase                                | 83  |
| 57949   | Prot              | Peptidase S28                                     | 68  |
| 107625  | Prot              | Zn-Dependent exopeptidases                        | 68  |
| 74226   | Unkn              | Unknown                                           | 64  |
| 121882  | Oxid              | GMC                                               | 64  |
| 130566  | Oxid              | GMC                                               | 64  |
| 60171   | Prot              | Peptidase S8                                      | 59  |
| 82943   | Oxid              | Amine oxidase                                     | 51  |
| 123302  | Othe              | $\alpha/\beta$ -Hydrolase                         | 49  |
| 70033   | Prot              | Aspartic-type endopeptidase                       | 45  |
| 99171   | CAZy              | GH18                                              | 41  |
| 116143  | Oxid              | LACC2                                             | 41  |
| 78300   | Este              | Ribonuclease T2                                   | 39  |
| 82653   | Oxid              | GMC                                               | 38  |
| 63775   | Oxid              | FAD binding catalytic                             | 37  |
| 91073   | Prot              | Metalloproteases (“zincins”)                      | 36  |
| 83972   | Prot              | Peptidase S10                                     | 34  |
| 48638   | Othe              | $\alpha/\beta$ -Hydrolase                         | 33  |
| 117204  | Oxid              | DyP4                                              | 33  |
| 88371   | Prot              | Peptidase                                         | 30  |
| 47522   | CAZy              | GH105                                             | 29  |
| 82945   | Othe              | Concanavalin A-like lectins/glucanases            | 29  |
| 115209  | CAZy              | GH76                                              | 29  |
| 91487   | CAZy              | GH31                                              | 24  |
| 51352   | Unkn              | Unknown                                           | 23  |
| 114605  | Oxid              | Amine oxidase                                     | 23  |
| 64738   | Oxid              | FAD binding oxidoreductase                        | 22  |
| 88568   | CAZy              | GH47                                              | 22  |
| 84903   | Unkn              | Unknown                                           | 20  |
| 106719  | Othe              | Protein kinase                                    | 20  |
| 47622   | Oxid              | Amine oxidase                                     | 19  |



|        |      |                                   |    |
|--------|------|-----------------------------------|----|
| 98024  | CAZy | GH3                               | 19 |
| 110973 | Unkn | Unknown                           | 19 |
| 116255 | CAZy | CBM13                             | 19 |
| 128249 | Unkn | Unknown                           | 19 |
| 62166  | Oxid | Galactose oxidase, central domain | 18 |
| 90832  | CAZy | GH1                               | 18 |
| 107973 | Oxid | FAD binding oxidoreductase        | 18 |
| 56239  | Este | Carboxylesterase                  | 17 |
| 127085 | Prot | Serine-type carboxypeptidase      | 16 |
| 98428  | Unkn | Unknown                           | 15 |
| 110190 | Este | Ribonuclease T2                   | 14 |
| 129600 | Oxid | GMC                               | 14 |
| 56494  | Este | Carboxylesterase                  | 13 |
| 87860  | Unkn | Unknown                           | 13 |
| 115859 | Unkn | Unknown                           | 13 |
| 122086 | CAZy | GH7                               | 13 |
| 44712  | CAZy | GH88                              | 12 |
| 88317  | Prot | Serine-type carboxypeptidase      | 12 |
| 117824 | Unkn | Unknown                           | 12 |
| 65857  | Oxid | GMC                               | 11 |
| 85079  | CAZy | GH5                               | 11 |
| 114400 | CAZy | GH5                               | 11 |
| 115140 | Prot | Aspartic-type endopeptidase       | 11 |
| 116181 | CAZy | GH79                              | 11 |
| 117545 | CAZy | GH25                              | 11 |
| 18313  | CAZy | GH18                              | 10 |
| 49304  | Othe | Cyanovirin-N                      | 10 |
| 89703  | Oxid | FAD binding oxidoreductase        | 10 |
| 89918  | CAZy | Six-hairpin glycosidase-like      | 10 |
| 94118  | Othe | Cyanovirin-N                      | 10 |
| 114288 | Este | Esterase/lipase                   | 10 |
| 117109 | CAZy | GH5                               | 10 |
| 117150 | CAZy | S-adenosylhomocysteine hydrolase  | 10 |
| 76980  | Unkn | Unknown                           | 9  |
| 84985  | CAZy | GH92                              | 9  |
| 85083  | Este | Metallophosphoesterase            | 9  |
| 87572  | Oxid | Cupredoxin                        | 9  |
| 99122  | Unkn | Unknown                           | 9  |
| 114602 | Prot | S8 and S53 peptidase              | 9  |
| 116285 | Unkn | Unknown                           | 9  |
| 117351 | CAZy | CE1-CBM1                          | 9  |
| 132167 | Unkn | Unknown                           | 9  |
| 137757 | Oxid | VP1                               | 9  |
| 48699  | CAZy | GH79                              | 8  |
| 54867  | CAZy | GH430CBM35                        | 8  |
| 62844  | Prot | Peptidase S9                      | 8  |
| 82641  | Prot | Serine-type peptidase             | 8  |
| 90315  | Oxid | FAD binding oxidoreductase        | 8  |

|        |      |                                                          |          |
|--------|------|----------------------------------------------------------|----------|
| 102212 | CAZy | Barwin-like endoglucanases                               | 8        |
| 117340 | Oxid | Aldo/keto reductase                                      | 8        |
| 123053 | CAZy | CE4                                                      | 8        |
| 70187  | Prot | Zn-dependent exopeptidase                                | 7        |
| 75940  | Othe | $\alpha/\beta$ -Hydrolase                                | 7        |
| 77872  | Unkn | Unknown                                                  | 7        |
| 87354  | CAZy | GH35                                                     | 7        |
| 89439  | Prot | Peptidase                                                | 7        |
| 99623  | Othe | Membrane attack complex component/perforin/complement C9 | 7        |
| 103254 | Unkn | Unknown                                                  | 7        |
| 115427 | Unkn | Unknown                                                  | 7        |
| 115581 | CAZy | GH72-CBM43                                               | 7        |
| 115628 | CAZy | CE4                                                      | 7        |
| 116283 | Unkn | Unknown                                                  | 7        |
| 117229 | Prot | Metallopeptidase (zinc binding)                          | 7        |
| 45206  | CAZy | GH6-CBM1                                                 | 6        |
| 47034  | Prot | S8 and S53 peptidase                                     | 6        |
| 51118  | Unkn | Unknown                                                  | 6        |
| 51203  | CAZy | CBM13                                                    | 6        |
| 58710  | CAZy | GH78                                                     | 6        |
| 61416  | CAZy | GH47                                                     | 6        |
| 71475  | Este | Lipase                                                   | 6        |
| 81117  | Oxid | LACC10                                                   | 6        |
| 84333  | CAZy | GH92                                                     | 6        |
| 85084  | Este | Metallophosphoesterase                                   | 6        |
| 87575  | Prot | S8 and S53 peptidase                                     | 6        |
| 105520 | Othe | $\beta$ -Lactamase                                       | 6        |
| 116309 | Oxid | FAD binding oxidoreductase acting on CH-OH groups        | 6        |
| 128131 | CAZy | GH105                                                    | 6        |
| 63218  | Oxid | NADH Dehydrogenase                                       | 5        |
| 69649  | Oxid | GMC                                                      | 5        |
| 74704  | Unkn | Unknown                                                  | 5        |
| 78619  | CAZy | CE 12                                                    | 5        |
| 85343  | Unkn | Unknown                                                  | 5        |
| 88908  | Oxid | GMC                                                      | 5        |
| 90219  | CAZy | GH27                                                     | 5        |
| 117851 | Unkn | Unknown                                                  | 5        |
| 132563 | CAZy | GH16                                                     | <b>5</b> |
| 133709 | Unkn | Unknown                                                  | 5        |
| 54071  | CAZy | Barwin-related endoglucanase                             | 4        |
| 60707  | CAZy | GH18                                                     | 4        |
| 82770  | Othe | Phosphoglycerate mutase-like                             | 4        |
| 82810  | CAZy | CE16                                                     | 4        |
| 83849  | CAZy | GH7                                                      | 4        |
| 84329  | Pep  | Subtilase                                                | 4        |
| 88786  | CAZy | GH30                                                     | 4        |
| 117056 | Unkn | Unknown                                                  | 4        |
| 117301 | Othe | $\beta$ -1,6-N-Acetylglucosaminyltransferase             | 4        |

|        |      |                                       |   |
|--------|------|---------------------------------------|---|
| 117516 | Unkn | Unknown                               | 4 |
| 44321  | Unkn | Unknown                               | 3 |
| 53421  | Unkn | Unknown                               | 3 |
| 58838  | Unkn | Unknown                               | 3 |
| 65411  | CAZy | GH130CBM20                            | 3 |
| 67327  | Unkn | Unknown                               | 3 |
| 68673  | Oxid | Aldo/keto reductase                   | 3 |
| 69174  | Unkn | Unknown                               | 3 |
| 70356  | CAZy | CE4                                   | 3 |
| 74732  | Unkn | Unknown                               | 3 |
| 76006  | Othe | Yeast cell wall synthesis KRE9KNH1    | 3 |
| 82608  | Othe | Amidase                               | 3 |
| 84350  | Oxid | Glyoxal oxidase                       | 3 |
| 85298  | Prot | Cysteine-type endopeptidase           | 3 |
| 86577  | Unkn | Unknown                               | 3 |
| 88922  | Unkn | Unknown                               | 3 |
| 89111  | Prot | Peptidase S9                          | 3 |
| 92243  | Othe | GrpE nucleotide exchange factor       | 3 |
| 93955  | Oxid | AAO                                   | 3 |
| 96527  | Prot | Serine carboxypeptidase               | 3 |
| 109117 | Othe | Ubiquitin and ubiquitin-like proteins | 3 |
| 112290 | CAZy | CE1                                   | 3 |
| 112745 | CAZy | CE4                                   | 3 |
| 114053 | CAZy | Barwin-like endoglucanases            | 3 |
| 114158 | Unkn | Unknown                               | 3 |
| 114510 | Oxid | GMC                                   | 3 |
| 115916 | CAZy | GH5                                   | 3 |
| 116926 | CAZy | CE8                                   | 3 |
| 117534 | CAZy | GH27                                  | 3 |
| 117616 | Oxid | GMC                                   | 3 |
| 132288 | CAZy | Barwin-related endoglucanase          | 3 |
| 20650  | Unkn | Unknown                               | 2 |
| 28894  | CAZy | GH16                                  | 2 |
| 43698  | CAZy | GH6-CBM1                              | 2 |
| 46813  | Othe | Thaumatococcus, pathogenesis-related  | 2 |
| 54605  | Este | Ribonuclease T 2                      | 2 |
| 61868  | CAZy | GH27                                  | 2 |
| 62096  | Othe | Amidohydrolase 2                      | 2 |
| 62259  | Unkn | Unknown                               | 2 |
| 64533  | Unkn | Unknown                               | 2 |
| 80522  | Este | Lipase 3                              | 2 |
| 81104  | Oxid | LACC6                                 | 2 |
| 82200  | Unkn | Unknown                               | 2 |
| 85018  | CAZy | GH28                                  | 2 |
| 85420  | CAZy | GH18                                  | 2 |
| 87754  | CAZy | GH16                                  | 2 |
| 89571  | Oxid | FAD linked oxidase,                   | 2 |
| 91578  | CAZy | GH43                                  | 2 |

|        |      |                                       |      |
|--------|------|---------------------------------------|------|
| 97623  | CAZy | GH43                                  | 2    |
| 108781 | Unkn | Unknown                               | 2    |
| 110578 | Unkn | Unknown                               | 2    |
| 114415 | Este | DNase I-like                          | 2    |
| 114637 | Prot | Serine-type peptidase                 | 2    |
| 114771 | CAZy | GH7-CBM1                              | 2    |
| 115573 | Othe | Transcription initiation factor TFIID | 2    |
| 115623 | CAZy | CE4                                   | 2    |
| 116292 | CAZy | GH79                                  | 2    |
| 116829 | Othe | Phosphoglucomutase                    | 2    |
| 116877 | Unkn | Unknown                               | 2    |
| 117023 | Othe | Isomerase YbhE                        | 2    |
| 117142 | Unkn | Unknown                               | 2    |
| 117317 | Unkn | Unknown                               | 2    |
| 125794 | CAZy | CE4                                   | 2    |
| 129907 | Prot | Caspase                               | 2    |
| Total  |      |                                       | 5966 |

<sup>1</sup>Semi-quantitative analysis based on PSM (peptide-spectrum match) values; <sup>2</sup>Protein types= CAZy, carbohydrate-active proteins; Este, esterases; Othe, proteins with other functions; Oxid, oxidoreductases; Prot, proteases; Unkn, unknown-function proteins
