# Supplementary material for: A secretomic view of woody and nonwoody lignocellulose degradation by Pleurotus ostreatus
Source: Biotechnol Biofuels. 2016 Feb 29;9:49. doi: 10.1186/s13068-016-0462-9 (PMC4772462; doi:10.1186/s13068-016-0462-9)
Supplement: Supplementary file 1 — 10.1186/s13068-016-0462-9 Protein diversity and CAZy and oxidoreductase Venn diagrams in the three P. ostreatus secretomes analyzed. [file 13068_2016_462_MOESM1_ESM.pdf]

**ADDITIONAL FILE 1: Supplemental figures**

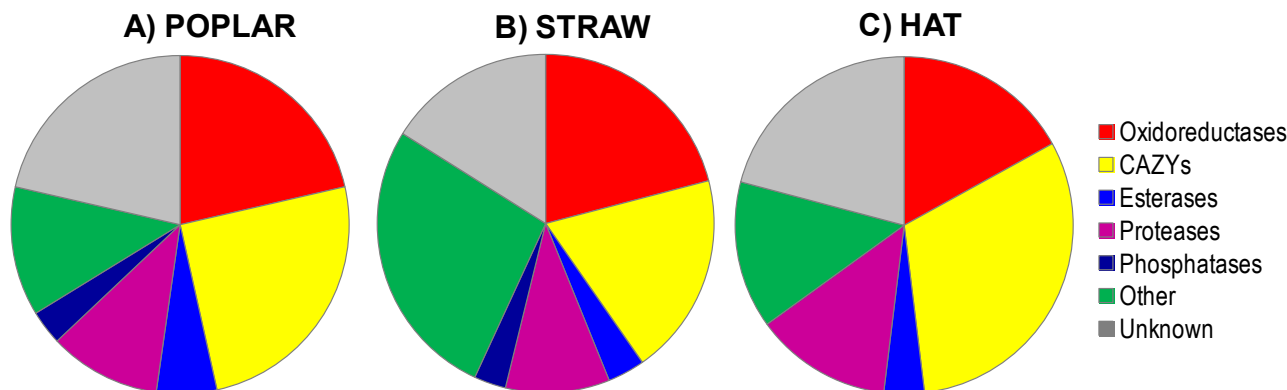

**Figure S1. Protein numbers (diversity) of the different functional types found in the secretomes from different media. (A) Poplar chips. (B) Wheat straw. (C) HAT (glucose) medium (see Additional file 2: Tables S1-S3 for the complete protein lists in each of the secretomes).**

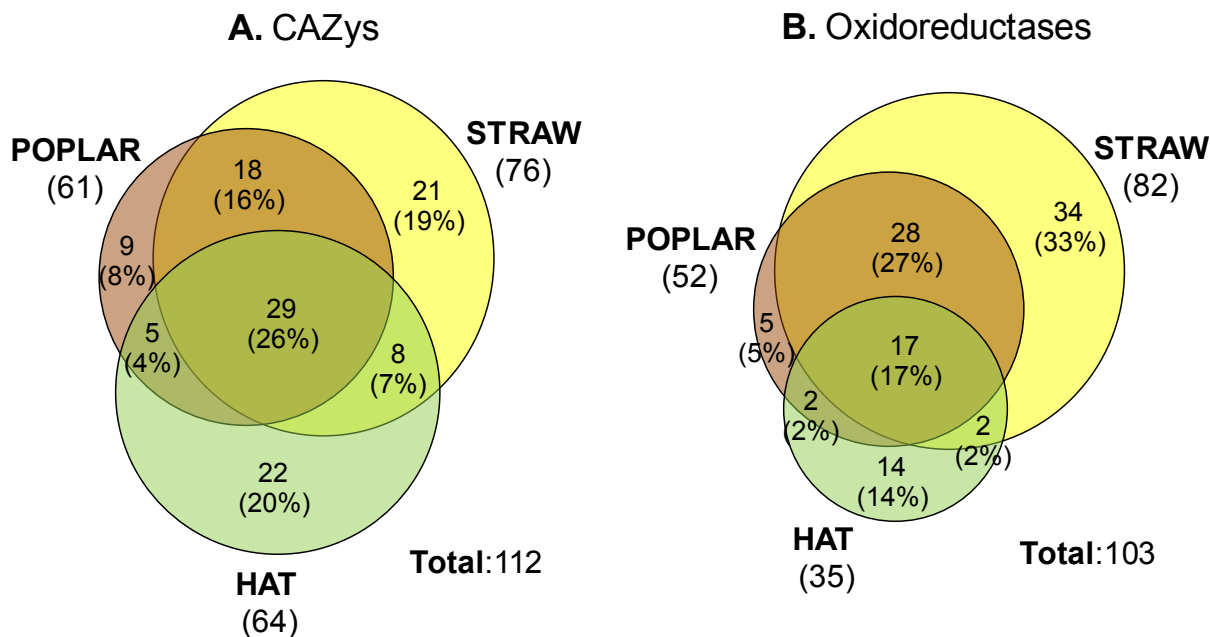

**Figure S2. Venn diagrams of CAZy (A) and oxidoreductase (B) numbers in secretomes. The numbers of unique and shared proteins in the poplar wood, wheat straw and HAT secretomes are indicated (with percentages of total in parenthesis).**
